# Supplementary material
Source: HighWire-hosted journal article supplement (https://openheart.bmj.com/content/12/1/e003084)
Supplement: inline-supplementary-material-1 [file inline-supplementary-material-1.pdf]

Supplementary Data

Elements

**Supplementary eTable 1.** Preoperative baseline- and exercise data according to the categorisation of SBP response. .... **2**

**Supplementary eTable 2.** Detailed preoperative baseline- and exercise data for patients categorised as “drops” in systolic blood pressure..... **3**

**Supplementary eTable 1. Preoperative baseline- and exercise data according to the categorisation of SBP response.**

|                                                | SBP response to exercise at CPET1 |                        |                      |
|------------------------------------------------|-----------------------------------|------------------------|----------------------|
|                                                | Normal<br>>0.25mmHg/Watt          | Flat<br>≤0.25mmHg/Watt | Drop<br><0 mmHg/Watt |
| Numbers (n)                                    | 18                                | 23                     | 4                    |
| Gender (Male/female)                           | 11/7                              | 15/8                   | 2/2                  |
| Age (years)                                    | 64.5 ± 8.6                        | 66.9 ± 9.0             | 71.5 ± 7.1           |
| Height (cm)                                    | 174 ± 11                          | 172 ± 9                | 167 ± 13             |
| Weight (kg)                                    | 84 ± 14                           | 83 ± 13                | 76 ± 14              |
| BMI (kg × m <sup>-2</sup> )                    | 27.8 ± 4.7                        | 28.0 ± 3.5             | 27.2 ± 2.0           |
| Hb (g × L <sup>-1</sup> ) <sup>a</sup>         | 144 ± 9                           | 143 ± 9                | 143 ± 8              |
|                                                |                                   |                        |                      |
| LVEF (%)                                       | 60 ± 8                            | 58 ± 4                 | 58 ± 2               |
| AoV <sub>max</sub> (m/s)                       | 4.6 ± 0.4                         | 4.6 ± 0.6              | 4.6 ± 0.3            |
| AVA (cm <sup>2</sup> )                         | 0.73 ± 0.18                       | 0.69 ± 0.23            | 0.70 ± 0.20          |
|                                                |                                   |                        |                      |
| Hypertension <sup>b</sup> (n, %)               | 13 (72%)                          | 9 (39%)                | 3 (75%)              |
| Beta-blocker (n, %)                            | 5 (28%)                           | 5 (22%)                | 1 (25%)              |
| ACE-Inhibitor or ARB (n, %)                    | 6 (33%)                           | 3 (13%)                | 1 (25%)              |
|                                                |                                   |                        |                      |
| SBP <sub>supine</sub> (mmHg)                   | 134 ± 17                          | 136 ± 18               | 145 ± 6              |
| DBP <sub>supine</sub> (mmHg)                   | 76 ± 8                            | 81 ± 10                | 70 ± 8               |
| HR at rest (beat × min <sup>-1</sup> )         | 68 ± 11                           | 67 ± 10                | 69 ± 15              |
| SBP at rest <sup>***</sup> (mmHg)              | 137 ± 16                          | 139 ± 19               | 144 ± 11             |
| SBP <sub>ss</sub> (mmHg)                       | 158 ± 19                          | 155 ± 23               | 176 ± 19             |
|                                                |                                   |                        |                      |
| Respiratory exchange ratio                     | 1.15 ± 0.08                       | 1.14 ± 0.07            | 1.11 ± 0.12          |
| Maximal HR (beat × min <sup>-1</sup> )         | 137 ± 23                          | 136 ± 18               | 133 ± 14             |
| Maximal workload (Watts)                       | 132 ± 43                          | 130 ± 42               | 109 ± 51             |
| Maximal SBP (mmHg)                             | 186 ± 27                          | 173 ± 22               | 198 ± 26             |
| Maximal SBP of predicted <sup>c</sup> (%)      | 93 ± 12                           | 85 ± 9                 | 99 ± 11              |
| Delta SBP <sup>c</sup>                         | 49 ± 26                           | 34 ± 19                | 54 ± 24              |
| SBP/Watt-slope                                 | 0.35 ± 0.23                       | 0.21 ± 0.13            | 0.11 ± 0.31          |
| SBP/Watt-slope % of predicted <sup>c</sup> (%) | 93 ± 11                           | 86 ± 9                 | 99 ± 11              |
| Rating of maximal perceived exertion           | 17 ± 2                            | 17 ± 1                 | 16 ± 1               |
| Rating of maximal chest pain                   | 0.2 ± 0.8                         | 0.17 ± 0.65            | 0.75 ± 0.96          |
| Rating of maximal dyspnoea                     | 6 ± 2                             | 6 ± 2                  | 4 ± 3                |

Baseline- and exercise data on 45 patients performing preoperative cardiopulmonary exercise tests according to the categorisation of SBP response. Data are presented on all patients, regardless of completed follow-up measurement or respiratory exchange ratio. Data presented as Mean ± SD (continuous data) or as n (percentage) for categorical data. <sup>a</sup>One missing data, n=44. <sup>b</sup>Hypertension defined as antihypertensive medication and/or a clinical diagnosis. <sup>c</sup>Missing SBP at rest replaced by SBP-supine minus 4mmHg for nine patients preoperatively.

ACE, angiotensin-converting enzyme; ARB, angiotensin II receptor blocker; AoV<sub>max</sub>, peak systolic velocity over the aortic valve; AVA, aortic valve area; BMI, body mass index; CPET, cardiopulmonary exercise testing; DBP, diastolic blood pressure; Hb, haemoglobin; HR, heart rate; LVEF, left ventricular ejection fraction; SBP, systolic blood pressure.

**Supplementary eTable 2. Detailed preoperative baseline- and exercise data for patients categorised as “drops” in systolic blood pressure.**

|                                         | Patients categorised as “drop” in SBP during CPET1 |                         |                         |                           |
|-----------------------------------------|----------------------------------------------------|-------------------------|-------------------------|---------------------------|
|                                         | A                                                  | B                       | C                       | D                         |
| Gender                                  | Female                                             | Female                  | Male                    | Male                      |
| Age (years)                             | Early 70s                                          | Late 60s                | Early 80s               | Early 70s                 |
| Height (cm)                             | 162                                                | 151                     | 172                     | 182                       |
| Weight (kg)                             | 70                                                 | 64                      | 73                      | 97                        |
| BMI (kg × m <sup>-2</sup> )             | 26.7                                               | 28.1                    | 24.7                    | 29.3                      |
| Hb (g × L <sup>-1</sup> )               | 135                                                | 137                     | 148                     | 150                       |
|                                         |                                                    |                         |                         |                           |
| LVEF (%)                                | 56                                                 | 56                      | 61                      | 57                        |
| AVA (cm <sup>2</sup> )                  | 0.5                                                | * <sup>a</sup>          | 0.9                     | 0.7                       |
| AoVmax (m/s)                            | 4.5                                                | 4.9                     | 4.3                     | 4.6                       |
|                                         |                                                    |                         |                         |                           |
| SBP at rest (mmHg)                      | 140                                                | 140                     | 135                     | 160                       |
| Respiratory exchange ratio              | 1.20                                               | 0.97                    | 1.19                    | 1.06                      |
| Maximal HR (beat × min <sup>-1</sup> )  | 146                                                | 118                     | 125                     | 144                       |
| Maximal Workload (Watts)                | 109                                                | 40                      | 159                     | 129                       |
| Maximal SBP (mmHg)                      | 200                                                | 170                     | 210                     | 220                       |
| Maximal SBP of predicted (%)            | 95                                                 | 80                      | 100                     | 99                        |
| SBP/Watt-slope                          | 0.39                                               | * <sup>a</sup>          | * <sup>a</sup>          | 0.36                      |
| SBP/Watt-slope % of predicted (%)       | 69                                                 | * <sup>a</sup>          | * <sup>a</sup>          | 76                        |
| Reason for termination of exercise test | Leg fatigue                                        | Blood pressure reaction | Blood pressure reaction | Pathological ECG response |
| SBP Drop (mmHg)                         | -10                                                | -15                     | -20                     | -5                        |
| SBP Drop @ SBP (mmHg)                   | 200                                                | 170                     | 210                     | 220                       |
| SBP Drop @ Watt                         | 91                                                 | 20                      | 148                     | 102                       |
| SBP Drop @ time (minutes)               | 10:10                                              | 3:01                    | 14:51                   | 10:18                     |
| SBP Drop @ RER                          | 1.10                                               | 0.95                    | 1.09                    | 1.00                      |

Detailed descriptions of four subjects (A-D) categorised as “drops” in systolic blood pressure during preoperative CPET. <sup>a</sup>Indicates missing data.

AoVmax, peak systolic velocity over the aortic valve; AVA, aortic valve area; BMI, body mass index; CPET, cardiopulmonary exercise testing; ECG, electrocardiogram; Hb, haemoglobin; HR, heart rate; LVEF, left ventricular ejection fraction; SBP, systolic blood pressure; RER, respiratory exchange ratio.
